# Supplementary material for: Introduction and persistence of tularemia in Bulgaria
Source: PubMed Central journal article supplement — Infect Ecol Epidemiol. 2016 Oct 26;6:10.3402/iee.v6.32838. doi: 10.3402/iee.v6.32838 (PMC5084392; doi:10.3402/iee.v6.32838), 2016-10-26
Supplement: IEE-6-32838-s002.pdf [file IEE-6-32838-s002.pdf]

1 **Supplemental file 2. Assay interpretation**

2 Comparison of the amplification curve generated by the ancestral primer (blue,  
3 Diagram 1) and the derived primer (red, Diagram 2). Since the ancestral primers  
4 matches the SNP at the ultimate 3' end nucleotide the Cq value will be significantly  
5 lower compared to the non-complementary derived primer. Thus, the template  
6 exhibits the ancestral SNP state in this example. The products can be distinguished by  
7 comparing their T<sub>m</sub>-values (Diagram 2).

8

9 **Diagram 1**

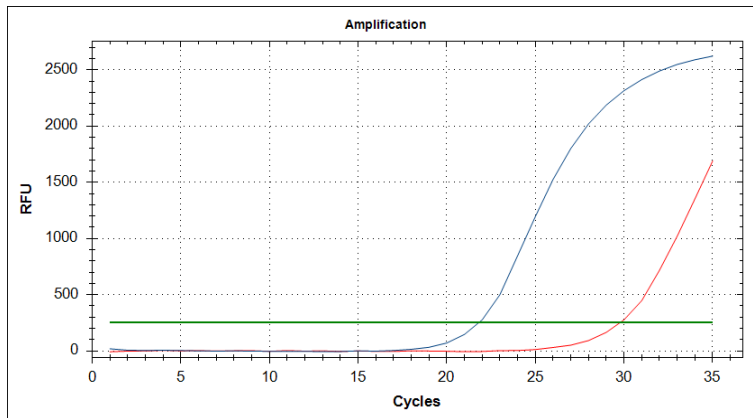

10

11 **Diagram 2**

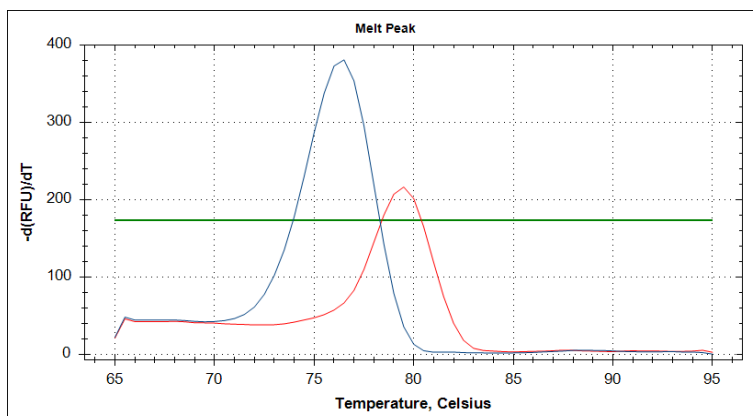

12
